# Supplementary material for: Effect of Breastmilk Microbiota and Sialylated Oligosaccharides on the Colonization of Infant Gut Microbial Community and Fecal Metabolome
Source: MDPI journal article supplement (doi:10.3390/metabo12111136), 2022-11-18
Supplement: s1 [file Supplementary materials_edit_upload.pdf › Supplementary materials_edit_upload.pdf]

## *Supplementary Materials*

# Effect of Breastmilk Microbiota and Sialylated Oligosaccharides on the Colonization of Infant Gut Microbial Community and Fecal Metabolome

Juan Ding<sup>1,†</sup>, Runze Ouyang<sup>2,3,4,†</sup>, Sijia Zheng<sup>2,3,4,†</sup>, Yanfeng Wang<sup>2,3,4</sup>, Yan Huang<sup>3</sup>, Xiao Ma<sup>5</sup>, Yuxin Zou<sup>6</sup>, Rong Chen<sup>7</sup>, Zhihong Zhuo<sup>8</sup>, Zhen Li<sup>9</sup>, Qi Xin<sup>10</sup>, Lina Zhou<sup>2,3,4</sup>, Surong Mei<sup>11</sup>, Jingyu Yan<sup>2</sup>, Xin Lu<sup>2,3,4</sup>, Zhigang Ren<sup>12,\*</sup>, Xinyu Liu<sup>2,3,4,\*</sup> and Guowang Xu<sup>2,3,4</sup>

<sup>1</sup> Department of Quality Control, The First Affiliated Hospital of Zhengzhou University, Zhengzhou 450052, China

<sup>2</sup> CAS Key Laboratory of Separation Science for Analytical Chemistry, Dalian Institute of Chemical Physics, Chinese Academy of Sciences, Dalian 116023, China

<sup>3</sup> University of Chinese Academy of Sciences, Beijing 100049, China

<sup>4</sup> Liaoning Province Key Laboratory of Metabolomics, Dalian 116023, China

<sup>5</sup> Department of Nursing, The First Affiliated Hospital of Zhengzhou University, Zhengzhou 450052, China

<sup>6</sup> Liaocheng People's Hospital, Liaocheng 252000, China

<sup>7</sup> Dalian Municipal Women and Children's Medical Center (Group), Dalian 116011, China

<sup>8</sup> Department of Pediatric, The First Affiliated Hospital of Zhengzhou University, Zhengzhou 450052, China

<sup>9</sup> Department of Interventional Radiology, The First Affiliated Hospital of Zhengzhou University, Zhengzhou 450052, China

<sup>10</sup> Academy of Medical Sciences, Zhengzhou University, Zhengzhou 450052, China

<sup>11</sup> State Key Laboratory of Environment Health (Incubation), Key Laboratory of Environment and Health, Ministry of Education, Key Laboratory of Environment and Health (Wuhan), Ministry of Environmental Protection, School of Public Health, Tongji Medical College, Huazhong University of Science and Technology, Wuhan 430030, China

<sup>12</sup> Department of Infectious Diseases, The First Affiliated Hospital of Zhengzhou University, Zhengzhou 450052, China

\* Correspondence: fccrenzg@zzu.edu.cn (Z.R.); liuxy2012@dicp.ac.cn (X.L.)

† These authors contributed equally to this work.

## **Supplementary Methods**

Sialic acid and sialylated oligosaccharides quantification

Nontargeted neonatal fecal metabolomic analysis

Supplementary references

## **Supplementary Figures and Tables**

## **Supplementary Methods**

### **Sialic acid and sialylated oligosaccharides quantification**

The online SPE-HILIC platform was established based on two High Performance Liquid Chromatography systems (HPLC, Shimazu, Kyoto, Japan) and a 2-position 6-port switching valve. One HPLC pump system was used as “cleanup pump” for purification and the other as “analysis pump” for analysis. The mobile phase of the cleanup pump consisted of ACN (A) and H<sub>2</sub>O (B) with a flow rate of 0.2 mL/min. The mobile phase of the analysis pump consisted of ACN/H<sub>2</sub>O/100 mM NH<sub>4</sub>FA (pH = 3.2) (v/v/v = 8/1/1) (C) and H<sub>2</sub>O/100 mM NH<sub>4</sub>FA (pH = 3.2) (v/v = 9/1) (D) with a flow rate of 0.2 mL/min. The sample solution was injected when the 6-port valve was on the 1-2 position. Then the valve was switched to 6-1 position after 0.1 min to link the SPE cleanup column to the analytical HILIC column, by what the sample could pass through the two columns through using a gradient of ACN/H<sub>2</sub>O (Table S10). At 5 min, the 6-port valve was switched to the initial position at which the two columns were at a “parallel” configuration.

The LTQ Orbitrap mass spectrometer (Thermo Fisher Scientific, Rockford, IL, USA) with electrospray ion (ESI) source was connected to the online SPE-HILIC platform for detection. The following conditions were applied: capillary temperature 325 °C, source voltage -4.0 kV and capillary voltage -40 V for ESI- analysis. The mass scan range was set to 300 - 1000 Dalton. The resolution of the Orbitrap was set to 30,000.

TraceFinder software (version 3.2, Thermo Fisher Scientific, Rockford, IL, USA) was used for peak extraction. All the peak areas were corrected by that of SA-<sup>13</sup>C6. Then the absolute concentrations of SA, 3'-SL and 6'-SL were calculated by external standard method.

### **Nontargeted neonatal fecal metabolomic analysis**

LC-MS based nontargeted metabolomic analysis was conducted on an Ultra Performance Liquid Chromatography (UPLC, Waters, Milford, MA, USA) -Q Exactive HF MS (Thermo Fisher Scientific,

Rockford, IL, USA) system with an ACQUITY UPLC BEH C8 column (Waters, 100 mm × 2.1 mm, 1.7 μm). In both ESI+ and ESI- modes, the mobile phases were water with 0.1% formic acid solution (A phase) and acetonitrile with 0.1% formic acid solution (B phase). The elution flow rate was 0.35 mL/min and the column temperature was 50 °C. In ESI+ mode, the gradient started at 5% B, held for 1 min, and linearly increased to 55% B within 14 min, then arrived at 100% at 15 min and maintained for 3 min, finally returned to 5% B and held for 2 min for post equilibration. In ESI- mode, the gradient started at 2% B, held for 1 min, and linearly increased to 72% B within 13 min, then arrived at 100% at 14 min and maintained for 3 min, finally returned to 5% B and held for 3 min for post equilibration. The MS conditions were set as the previous study [1].

Metabolite identification was performed by both OSI-SMMS database [2] and the mass bank of north America (MONA) database (<https://mona.fiehnlab.ucdavis.edu/>) according to accurate mass, retention time and MS/MS fragments. TraceFinder was used for peak extraction and then generated a peak list with the *m/z*, retention time and peak area of each sample. Inner standards were used for correcting the peak area.

### Supplementary references

1. Wang, Q.; Su, B.; Dong, L.; Jiang, T.; Tan, Y.; Lu, X.; Liu, X.; Lin, X.; Xu, G. Liquid chromatography-mass spectrometry-based nontargeted metabolomics predicts prognosis of hepatocellular carcinoma after curative resection. *J. Proteome Res.* **2020**, *19*, 3533-3541.
2. Zhao, X.; Zeng, Z.; Chen, A.; Lu, X.; Zhao, C.; Hu, C.; Zhou, L.; Liu, X.; Wang, X.; Hou, X.; et al. Comprehensive strategy to construct in-house database for accurate and batch identification of small molecular metabolites. *Anal. Chem.* **2018**, *90*, 7635-7643.

## Supplementary Figures

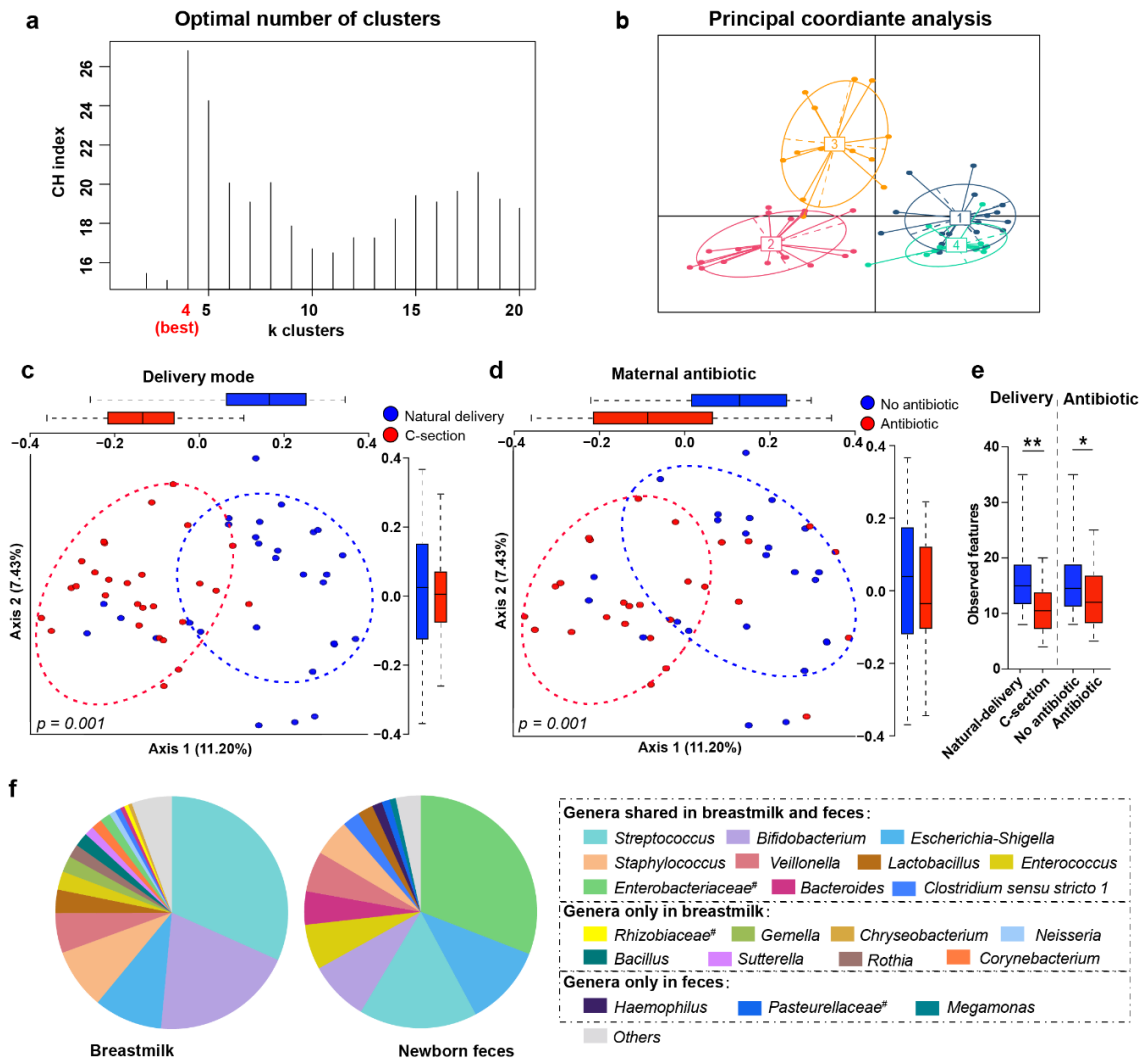

**Figure S1.** The neonatal breastmilk microbiota and the gut microbiota during the first week of life. **(a,b)** CH index indicates that the neonatal breastmilk microbiota could be better formed into four clusters. **(c)** PCoA plot of the gut microbiota in Natural-delivery and C-section infants based on Jaccard distance. **(d)** PCoA plot of the gut microbiota by maternal intake of antibiotics based on Jaccard distance. **(e)** Boxplots of alpha diversity calculated by observed features of the neonatal gut microbiota based on delivery mode and maternal antibiotic usage (Mann-Whitney U test,  $*p < 0.05$ ). **(f)** Comparison of breastmilk microbiota and newborn gut microbiota composition at the genus level. Bacteria with relative abundance  $> 1\%$  in either of breastmilk or feces are included in the pie chart. Pound sign (#) means unclassified bacteria at the genus level.

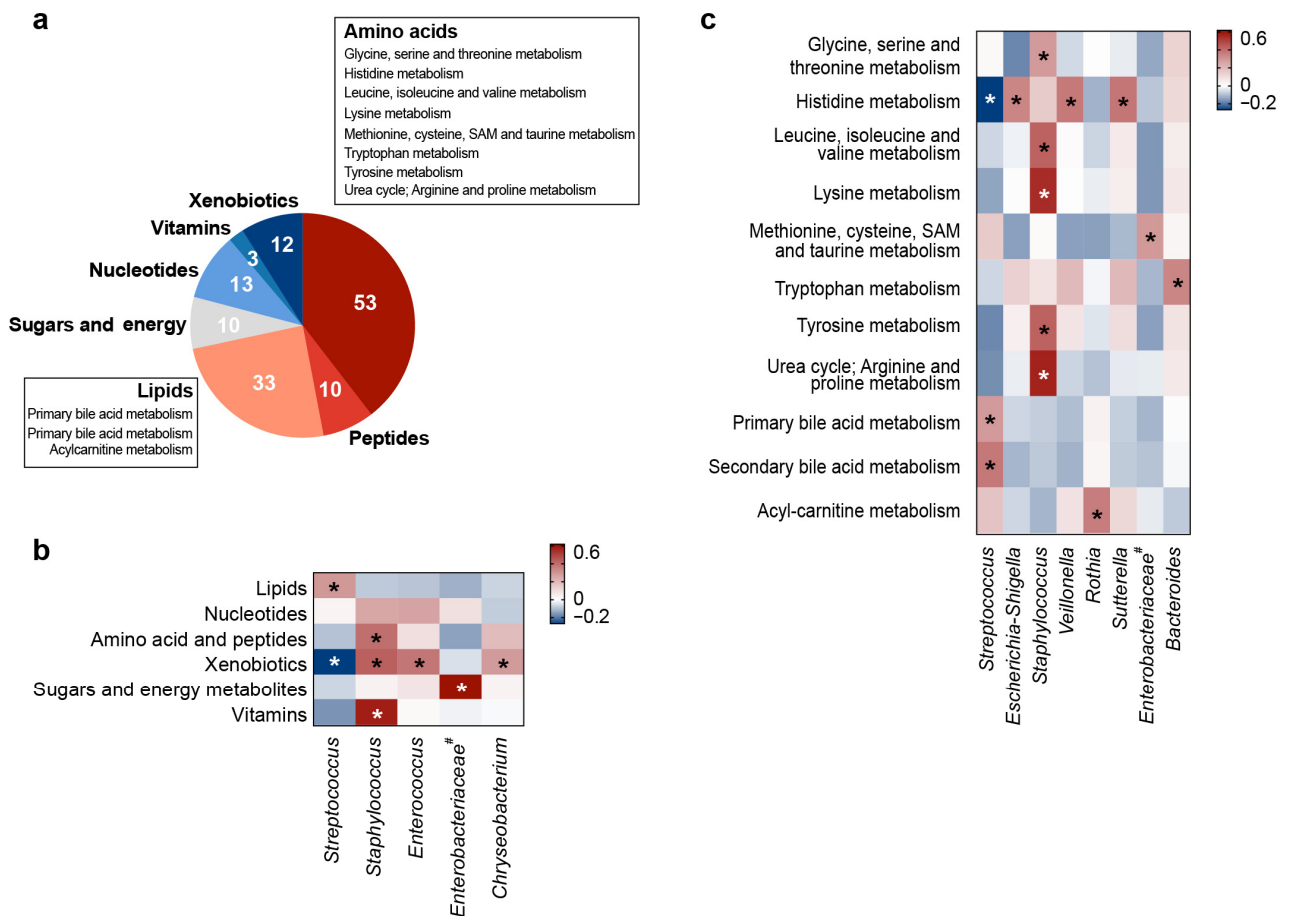

**Figure S2.** Correlations of breastmilk microbiota and the global fecal metabolome in the first week of lactation. **(a)** Number and category of neonatal fecal metabolites identified in the study. **(b)** Heatmap of partial correlation analysis between breastmilk microbiota and each category of fecal metabolite. **(c)** Heatmap of partial correlation analysis between breastmilk microbiota and metabolic pathway of neonatal fecal metabolome. Levels of metabolic pathway of neonatal fecal metabolome indicate the sum of the metabolites belonging to that pathway in this study. Asterisks (\*) in heatmap mean significant correlation ( $|R_1| > 0.2$  and  $p < 0.05$ ). Pound sign (#) means unclassified bacteria at the genus level.

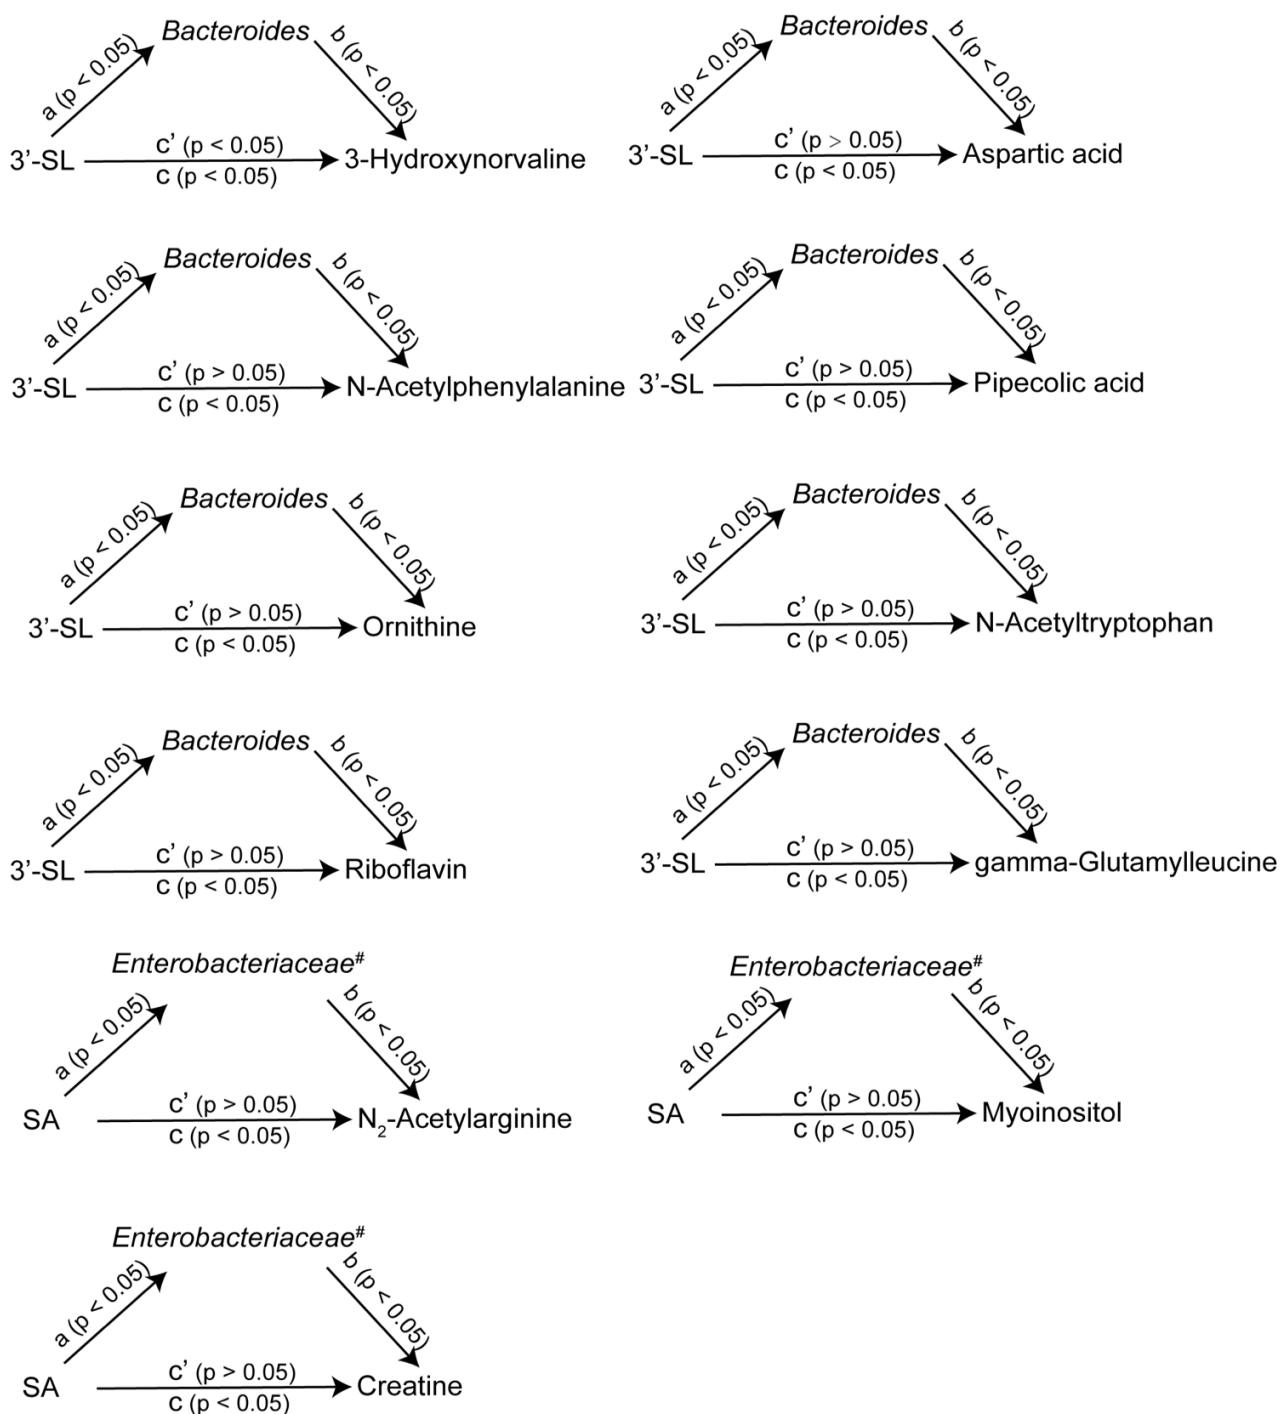

**Figure S3.** Mediation effect models of bacteria-related association between breastmilk sialylated oligosaccharides and the neonatal fecal metabolome. Pound sign (#) means unclassified bacteria at the genus level.

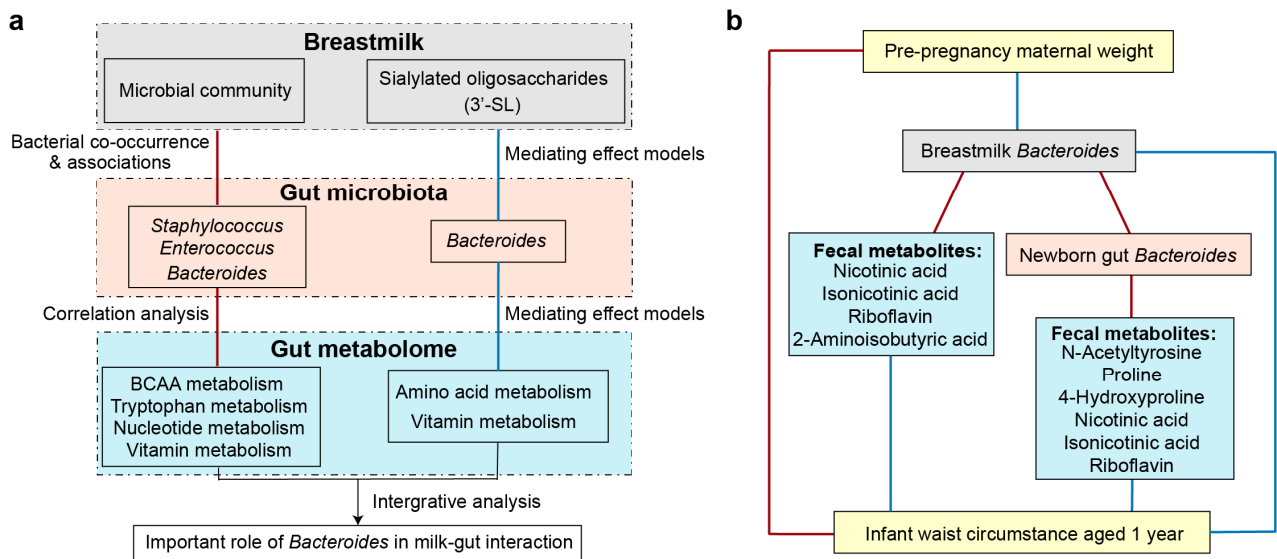

**Figure S4.** The important role of *Bacteroides* in milk-gut interaction and its association with the infant waist circumference at 1 year old. **(a)** Workflow of the comprehensive analysis of the effects of breastmilk microbiota and oligosaccharides on neonatal gut microbiota and fecal metabolome. 3'-SL: 3'-sialyllactose. **(b)** Frame of the correlation between *Bacteroides* and growth phenotype. Red lines indicate positive correlations and blue lines indicate negative correlations.



## Supplementary Tables

**Table S1.** Characteristics of the mothers and infants included in the study. (*Provided in a separate Excel file*)

**Table S2.** Concentrations of the stable isotope labeled internal standards.

| Internal standards       | Abbreviation | Concentration (µg/mL) |
|--------------------------|--------------|-----------------------|
| Acetylcarnitine-d3       | C2:0-d3      | 1                     |
| Decanoylcarnitine-d3     | C10:0-d3     | 0.5                   |
| Palmitoylcarnitine-d3    | C16:0-d3     | 0.5                   |
| Cholic acid-d4           | CA-d4        | 2                     |
| Chenodeoxycholic acid-d4 | CDCA-d4      | 1.6                   |
| Phenylalanine-d5         | Phe-d5       | 6.7                   |
| Tryptophan-d5            | Trp-d5       | 2.88                  |

**Table S3.** Average relative abundance of breastmilk microbiota at the genus level during the first week of lactation.

| <b>Genera</b>                          | <b>Relative abundance<br/>(Mean)</b> | <b>Relative abundance<br/>(SD)</b> | <b>Prevalence</b> |
|----------------------------------------|--------------------------------------|------------------------------------|-------------------|
| <i>Streptococcus</i>                   | 31.69%                               | 27.36%                             | 100%              |
| <i>Bifidobacterium</i>                 | 19.80%                               | 15.94%                             | 100%              |
| <i>Escherichia-Shigella</i>            | 9.50%                                | 9.72%                              | 100%              |
| <i>Staphylococcus</i>                  | 8.42%                                | 15.05%                             | 98%               |
| <i>Veillonella</i>                     | 5.54%                                | 6.09%                              | 98%               |
| <i>Lactobacillus</i>                   | 3.25%                                | 6.92%                              | 79%               |
| <i>Enterococcus</i>                    | 2.56%                                | 6.96%                              | 89%               |
| <i>Gemella</i>                         | 2.25%                                | 6.56%                              | 76%               |
| <i>Rothia</i>                          | 1.85%                                | 4.23%                              | 82%               |
| <i>Bacillus</i>                        | 1.93%                                | 8.88%                              | 52%               |
| <i>Sutterella</i>                      | 1.29%                                | 2.01%                              | 79%               |
| <i>Corynebacterium</i>                 | 1.50%                                | 4.39%                              | 68%               |
| <i>Enterobacteriaceae</i> <sup>#</sup> | 1.46%                                | 2.89%                              | 92%               |
| <i>Neisseria</i>                       | 0.89%                                | 4.88%                              | 58%               |
| <i>Clostridium sensu stricto 1</i>     | 0.80%                                | 1.02%                              | 87%               |
| <i>Bacteroides</i>                     | 0.59%                                | 1.86%                              | 73%               |
| <i>Rhizobiaceae</i> <sup>#</sup>       | 0.59%                                | 1.43%                              | 77%               |
| <i>Chryseobacterium</i>                | 0.52%                                | 3.37%                              | 24%               |

Pound sign (#) means unclassified bacteria at the genus level. Genera with >1% average relative abundance in the neonatal breastmilk are shown.

**Table S4.** Average relative abundance of newborn gut microbiota at the genus level during the first week of life.

| Genera                                 | Relative abundance<br>(Mean) | Relative abundance<br>(SD) | Prevalence |
|----------------------------------------|------------------------------|----------------------------|------------|
| <i>Enterobacteriaceae</i> <sup>#</sup> | 30.91%                       | 33.82%                     | 86%        |
| <i>Escherichia-Shigella</i>            | 11.26%                       | 21.06%                     | 65%        |
| <i>Streptococcus</i>                   | 16.43%                       | 23.96%                     | 95%        |
| <i>Bifidobacterium</i>                 | 8.33%                        | 14.99%                     | 74%        |
| <i>Enterococcus</i>                    | 6.28%                        | 16.55%                     | 61%        |
| <i>Bacteroides</i>                     | 4.64%                        | 11.35%                     | 40%        |
| <i>Veillonella</i>                     | 5.62%                        | 14.08%                     | 58%        |
| <i>Staphylococcus</i>                  | 5.10%                        | 15.02%                     | 89%        |
| <i>Clostridium sensu stricto 1</i>     | 2.45%                        | 7.34%                      | 32%        |
| <i>Lactobacillus</i>                   | 2.15%                        | 12.07%                     | 33%        |
| <i>Haemophilus</i>                     | 1.41%                        | 5.65%                      | 44%        |
| <i>Pasteurellaceae</i> <sup>#</sup>    | 1.11%                        | 7.50%                      | 9%         |
| <i>Megamonas</i>                       | 0.86%                        | 3.91%                      | 7%         |

Pound sign (#) means unclassified bacteria at the genus level. Genera with >1% average relative abundance in the neonatal gut are shown.

**Table S5.** General information of metabolites identified in newborn feces.

| rt (min) | m/z      | Metabolites                     | Category    | Database |
|----------|----------|---------------------------------|-------------|----------|
| 1.61     | 166.0861 | Phenylalanine                   | Amino acid  | OSI-SMMS |
| 2.44     | 205.0971 | Tryptophan                      | Amino acid  | OSI-SMMS |
| 0.83     | 182.0812 | Tyrosine                        | Amino acid  | OSI-SMMS |
| 1.21     | 132.1017 | Isoleucine                      | Amino acid  | OSI-SMMS |
| 1.12     | 132.1017 | Leucine                         | Amino acid  | OSI-SMMS |
| 0.82     | 118.0861 | Valine                          | Amino acid  | OSI-SMMS |
| 0.72     | 175.1189 | Arginine                        | Amino acid  | OSI-SMMS |
| 0.74     | 132.0302 | Aspartic acid                   | Amino acid  | OSI-SMMS |
| 0.76     | 148.0604 | Glutamic acid                   | Amino acid  | OSI-SMMS |
| 0.75     | 76.0392  | Glycine                         | Amino acid  | MONA     |
| 0.71     | 154.0624 | Histidine                       | Amino acid  | OSI-SMMS |
| 0.68     | 147.1128 | Lysine                          | Amino acid  | MONA     |
| 0.84     | 150.0583 | Methionine                      | Amino acid  | OSI-SMMS |
| 0.77     | 116.0705 | Proline                         | Amino acid  | OSI-SMMS |
| 0.75     | 106.0498 | Serine                          | Amino acid  | MONA     |
| 0.68     | 133.0971 | Ornithine                       | Amino acid  | OSI-SMMS |
| 0.77     | 176.0917 | Citrulline                      | Amino acid  | OSI-SMMS |
| 0.73     | 124.0074 | Taurine                         | Amino acid  | OSI-SMMS |
| 0.73     | 118.0511 | Threonine                       | Amino acid  | OSI-SMMS |
| 3.25     | 180.0654 | Hippuric acid                   | Xenobiotics | MONA     |
| 0.77     | 160.0968 | Isovalerylglycine               | Amino acid  | OSI-SMMS |
| 1.01     | 217.1182 | N <sub>2</sub> -Acetylarginine  | Amino acid  | OSI-SMMS |
| 0.78     | 175.1077 | N <sub>2</sub> -Acetylornithine | Amino acid  | OSI-SMMS |
| 0.80     | 189.1233 | N <sub>6</sub> -Acetyllysine    | Amino acid  | OSI-SMMS |
| 1.11     | 188.0566 | N-Acetylglutamic acid           | Amino acid  | OSI-SMMS |
| 3.85     | 174.1124 | N-Acetylleucine                 | Amino acid  | MONA     |
| 2.83     | 192.0688 | N-Acetylmethionine              | Amino acid  | MONA     |
| 3.97     | 206.0824 | N-Acetylphenylalanine           | Amino acid  | OSI-SMMS |
| 4.43     | 247.1075 | N-Acetyltryptophan              | Amino acid  | MONA     |
| 2.89     | 222.0773 | N-Acetyltyrosine                | Amino acid  | OSI-SMMS |
| 0.74     | 146.0460 | O-Acetylserine                  | Amino acid  | OSI-SMMS |
| 3.34     | 265.1180 | Phenylacetylglutamine           | Peptide     | OSI-SMMS |
| 1.83     | 203.1390 | Alanylleucine                   | Peptide     | MONA     |
| 2.68     | 281.1129 | Aspartylphenylalanine           | Peptide     | MONA     |
| 2.71     | 261.1443 | gamma-Glutamylleucine           | Peptide     | MONA     |
| 3.01     | 295.1285 | Glutamylphenylalanine           | Peptide     | MONA     |
| 1.93     | 189.1233 | Glycylleucine                   | Peptide     | MONA     |
| 0.80     | 173.0921 | Glycylproline                   | Peptide     | OSI-SMMS |
| 1.10     | 175.1077 | Glycylvaline                    | Peptide     | OSI-SMMS |
| 0.82     | 229.1546 | Leucylproline                   | Peptide     | OSI-SMMS |
| 1.90     | 233.1494 | Threonylleucine                 | Peptide     | OSI-SMMS |
| 4.60     | 146.0600 | Indole-3-carboxaldehyde         | Amino acid  | OSI-SMMS |
| 4.93     | 176.0705 | Indoleacetic acid               | Amino acid  | OSI-SMMS |
| 2.79     | 190.0498 | Kynurenic acid                  | Amino acid  | MONA     |
| 0.68     | 112.0868 | Histamine                       | Amino acid  | OSI-SMMS |
| 4.35     | 206.0811 | Indolelactic acid               | Amino acid  | OSI-SMMS |
| 0.78     | 139.0502 | Urocanic acid                   | Amino acid  | OSI-SMMS |
| 0.75     | 134.0447 | 3-Hydroxynorvaline              | Amino acid  | OSI-SMMS |

| rt (min) | m/z      | Metabolites              | Category                    | Database |
|----------|----------|--------------------------|-----------------------------|----------|
| 0.76     | 132.0655 | 4-Hydroxyproline         | Amino acid                  | OSI-SMMS |
| 1.02     | 138.0913 | Tyramine                 | Amino acid                  | OSI-SMMS |
| 1.38     | 190.1073 | 1-hydroxyhexanoylglycine | Lipid                       | OSI-SMMS |
| 1.01     | 104.0528 | 2-Aminoisobutyric acid   | Nucleotide                  | OSI-SMMS |
| 0.81     | 118.0861 | 5-Aminopentanoic acid    | Amino acid                  | OSI-SMMS |
| 0.80     | 162.0760 | Aminoadipic acid         | Amino acid                  | OSI-SMMS |
| 0.76     | 164.0917 | Bicine                   | Xenobiotics                 | OSI-SMMS |
| 0.76     | 132.0767 | Creatine                 | Amino acid                  | OSI-SMMS |
| 0.75     | 114.0662 | Creatinine               | Amino acid                  | OSI-SMMS |
| 0.75     | 104.0705 | gamma-Aminobutyric acid  | Amino acid                  | MONA     |
| 0.75     | 120.0655 | Homoserine               | Amino acid                  | MONA     |
| 0.82     | 130.0863 | Pipecolic acid           | Amino acid                  | OSI-SMMS |
| 1.02     | 130.0499 | Pyroglutamic acid        | Amino acid                  | MONA     |
| 2.26     | 122.0964 | Phenylethylamine         | Amino acid                  | MONA     |
| 0.75     | 241.0309 | Cystine                  | Amino acid                  | OSI-SMMS |
| 7.24     | 471.2417 | CAS                      | Lipid                       | OSI-SMMS |
| 6.04     | 464.3011 | GCA                      | Lipid                       | OSI-SMMS |
| 6.86     | 448.3064 | GCDCA                    | Lipid                       | OSI-SMMS |
| 6.28     | 528.2628 | GCDCS                    | Lipid                       | OSI-SMMS |
| 5.89     | 514.2841 | TCA                      | Lipid                       | OSI-SMMS |
| 6.76     | 407.2801 | CA                       | Lipid                       | OSI-SMMS |
| 7.84     | 391.2852 | CDCA                     | Lipid                       | OSI-SMMS |
| 6.16     | 405.2644 | 7-ketodeoxycholic acid   | Lipid                       | OSI-SMMS |
| 8.01     | 391.2852 | DCA                      | Lipid                       | OSI-SMMS |
| 8.73     | 377.2985 | LCA                      | Lipid                       | OSI-SMMS |
| 5.73     | 512.2680 | GLCS                     | Lipid                       | OSI-SMMS |
| 5.16     | 528.2630 | GUDCS                    | Lipid                       | OSI-SMMS |
| 0.77     | 209.0304 | Glucaric acid            | Sugar and energy metabolite | OSI-SMMS |
| 0.78     | 260.0529 | Glucosamine 6-phosphate  | Sugar and energy metabolite | OSI-SMMS |
| 0.76     | 193.0354 | Glucuronic acid          | Sugar and energy metabolite | OSI-SMMS |
| 0.78     | 256.0594 | N-Acetylglucosamine      | Sugar and energy metabolite | OSI-SMMS |
| 0.78     | 308.0987 | N-Acetylneuraminic acid  | Sugar and energy metabolite | OSI-SMMS |
| 0.75     | 341.1086 | Trehalose                | Xenobiotic                  | OSI-SMMS |
| 0.74     | 527.1370 | Maltotriose              | Sugar and energy metabolite | OSI-SMMS |
| 0.75     | 162.1122 | L-Carnitine              | Lipid                       | OSI-SMMS |
| 0.82     | 204.1230 | Carnitine C2:0           | Lipid                       | OSI-SMMS |
| 3.18     | 246.1698 | Carnitine C5:0           | Lipid                       | OSI-SMMS |
| 9.12     | 344.2792 | Carnitine C12:0          | Lipid                       | OSI-SMMS |
| 8.73     | 396.3122 | Carnitine C16:2          | Lipid                       | OSI-SMMS |
| 2.14     | 232.1542 | Carnitine C4:0           | Lipid                       | OSI-SMMS |
| 7.60     | 316.2479 | Carnitine C10:0          | Lipid                       | OSI-SMMS |
| 4.34     | 312.2165 | Carnitine C10:2          | Lipid                       | OSI-SMMS |
| 8.39     | 342.2635 | Carnitine C12:1          | Lipid                       | OSI-SMMS |
| 9.06     | 368.2791 | Carnitine C14:0          | Lipid                       | OSI-SMMS |
| 9.94     | 370.2947 | Carnitine C14:1          | Lipid                       | OSI-SMMS |
| 1.19     | 218.1386 | Carnitine C3:0           | Lipid                       | OSI-SMMS |
| 4.28     | 260.1854 | Carnitine C6:0           | Lipid                       | OSI-SMMS |
| 6.03     | 288.2166 | Carnitine C8:0           | Lipid                       | OSI-SMMS |
| 6.98     | 314.2321 | Carnitine C10:1          | Lipid                       | OSI-SMMS |
| rt (min) | m/z      | Metabolites              | Category                    | Database |

|      |          |                                  |                             |          |
|------|----------|----------------------------------|-----------------------------|----------|
| 0.85 | 348.0687 | 3'-AMP                           | Nucleotide                  | OSI-SMMS |
| 0.77 | 136.0618 | Adenine                          | Nucleotide                  | OSI-SMMS |
| 0.83 | 330.0581 | Cyclic AMP                       | Nucleotide                  | MONA     |
| 0.76 | 112.0505 | Cytosine                         | Nucleotide                  | OSI-SMMS |
| 1.40 | 243.0974 | Thymidine                        | Nucleotide                  | MONA     |
| 1.40 | 127.0502 | Thymine                          | Nucleotide                  | MONA     |
| 0.83 | 111.0201 | Uracil                           | Nucleotide                  | OSI-SMMS |
| 1.06 | 243.0622 | Uridine                          | Nucleotide                  | OSI-SMMS |
| 0.81 | 166.0723 | 1-Methylguanine                  | Nucleotide                  | OSI-SMMS |
| 1.11 | 183.0512 | 1-Methyluric acid                | Xenobiotic                  | OSI-SMMS |
| 0.82 | 137.0456 | Hypoxanthine                     | Nucleotide                  | OSI-SMMS |
| 1.01 | 151.0262 | Oxypurinol                       | Xenobiotic                  | OSI-SMMS |
| 0.77 | 179.0562 | Paraxanthine                     | Xenobiotic                  | OSI-SMMS |
| 0.81 | 169.0356 | Uric acid                        | Nucleotide                  | OSI-SMMS |
| 0.66 | 153.0393 | Xanthine                         | Nucleotide                  | OSI-SMMS |
| 1.03 | 147.0300 | 2-Hydroxypentanedioic acid       | Lipid                       | OSI-SMMS |
| 1.03 | 191.0198 | Citric acid                      | Sugar and energy metabolite | OSI-SMMS |
| 1.04 | 89.0245  | Lactic acid                      | Sugar and energy metabolite | OSI-SMMS |
| 0.82 | 133.0143 | Malic acid                       | Sugar and energy metabolite | OSI-SMMS |
| 0.69 | 188.1757 | N <sub>8</sub> -Acetylspermidine | Amino acid                  | OSI-SMMS |
| 0.69 | 131.1291 | N-Acetylputrescine               | Amino acid                  | OSI-SMMS |
| 0.91 | 87.0088  | Pyruvic acid                     | Sugar and energy metabolite | OSI-SMMS |
| 1.61 | 120.0807 | Indoline                         | Xenobiotic                  | OSI-SMMS |
| 1.01 | 165.0546 | 2-Hydroxycinnamic acid           | Xenobiotic                  | OSI-SMMS |
| 0.76 | 146.1175 | 4-Trimethylammoniobutanoic acid  | Lipid                       | MONA     |
| 0.76 | 146.1175 | Acetylcholine                    | Lipid                       | OSI-SMMS |
| 0.73 | 104.1069 | Choline                          | Lipid                       | OSI-SMMS |
| 0.75 | 365.1051 | Gentiobiose                      | Xenobiotic                  | MONA     |
| 0.75 | 179.0562 | Myoinositol                      | Lipid                       | OSI-SMMS |
| 0.98 | 124.0393 | Isonicotinic acid                | Xenobiotic                  | OSI-SMMS |
| 0.88 | 124.0393 | Nicotinic acid                   | Vitamin                     | OSI-SMMS |
| 1.95 | 220.1179 | Pantothenic acid                 | Vitamin                     | OSI-SMMS |
| 1.01 | 136.0757 | <i>p</i> -Octopamine             | Xenobiotic                  | MONA     |
| 0.67 | 72.0807  | Pyrrolidine                      | Xenobiotic                  | OSI-SMMS |
| 0.67 | 146.1651 | Spermidine                       | Amino acid                  | OSI-SMMS |
| 3.34 | 377.1451 | Riboflavin                       | Vitamin                     | MONA     |
| 4.35 | 130.0651 | Indole-3-carbinol                | Amino acid                  | MONA     |

**Table S6.** Partial correlation analysis of breastmilk microbiota and the neonatal fecal metabolome.*(Provided in a separate Excel file)***Table S7.** Partial correlation analysis between breastmilk sialylated oligosaccharides and newborn fecal metabolome.

| Breastmilk sialylated oligosaccharides | Metabolites in newborn feces   | R <sub>1</sub> | p     |
|----------------------------------------|--------------------------------|----------------|-------|
| SA                                     | 2-Hydroxypentanedioic acid     | 0.484          | 0.000 |
| SA                                     | Histamine                      | 0.469          | 0.001 |
| SA                                     | Glycine                        | 0.412          | 0.003 |
| SA                                     | Carnitine C4:0                 | 0.387          | 0.005 |
| SA                                     | Oxypurinol                     | 0.339          | 0.015 |
| SA                                     | Homoserine                     | 0.339          | 0.015 |
| SA                                     | Tryptophan                     | 0.332          | 0.017 |
| SA                                     | N-Acetylglutamic acid          | 0.322          | 0.021 |
| SA                                     | N <sub>2</sub> -Acetylarginine | 0.299          | 0.033 |
| SA                                     | Myoinositol                    | -0.286         | 0.042 |
| SA                                     | Creatine                       | 0.278          | 0.048 |
| 3'-SL                                  | 3-Hydroxynorvaline             | -0.431         | 0.002 |
| 3'-SL                                  | Aspartic acid                  | -0.329         | 0.018 |
| 3'-SL                                  | N-Acetylphenylalanine          | -0.329         | 0.019 |
| 3'-SL                                  | Pipecolic acid                 | -0.323         | 0.021 |
| 3'-SL                                  | Ornithine                      | -0.317         | 0.023 |
| 3'-SL                                  | N-Acetyltryptophan             | -0.310         | 0.027 |
| 3'-SL                                  | Riboflavin                     | -0.288         | 0.041 |
| 3'-SL                                  | gamma-Glutamylleucine          | -0.285         | 0.043 |
| 6'-SL                                  | N-Acetylputrescine             | 0.391          | 0.005 |
| 6'-SL                                  | Glucaric acid                  | -0.318         | 0.023 |
| 6'-SL                                  | Thymine                        | 0.309          | 0.027 |
| 6'-SL                                  | Thymidine                      | 0.298          | 0.033 |
| 6'-SL                                  | Glucuronic acid                | -0.298         | 0.034 |

**Table S8.** Mediation effect model coefficients among breastmilk sialylated oligosaccharides-associated gut bacteria, breastmilk sialylated oligosaccharides and the neonatal fecal metabolome. (Provided in a separate Excel file)

**Table S9.** Association of *Bacteroides* in breastmilk and newborn gut with fecal metabolites.

| Bacteria                             | Fecal metabolites      | B        |             |             | <i>p</i> |
|--------------------------------------|------------------------|----------|-------------|-------------|----------|
|                                      |                        | Mean     | Lower limit | Upper limit |          |
| Breastmilk<br><i>Bacteroides</i>     | Isonicotinic acid      | 5.61E-02 | 1.03E-01    | 9.29E-03    | 0.020    |
|                                      | Nicotinic acid         | 3.02E-02 | 5.30E-02    | 7.49E-03    | 0.010    |
|                                      | 2-Aminoisobutyric acid | 1.64E-03 | 3.24E-03    | 3.14E-05    | 0.046    |
|                                      | Riboflavin             | 6.67E-04 | 1.25E-03    | 8.86E-05    | 0.025    |
|                                      | Proline                | 9.78E-02 | 1.89E-01    | 6.58E-03    | 0.036    |
| Newborn<br>gut<br><i>Bacteroides</i> | Isonicotinic acid      | 9.98E-03 | 1.78E-02    | 2.15E-03    | 0.014    |
|                                      | Nicotinic acid         | 5.17E-03 | 8.97E-03    | 1.36E-03    | 0.009    |
|                                      | N-Acetyltyrosine       | 2.49E-03 | 4.39E-03    | 5.89E-04    | 0.011    |
|                                      | 4-Hydroxyproline       | 8.42E-04 | 1.50E-03    | 1.88E-04    | 0.013    |

Blue indicates significant associations of breastmilk *Bacteroides* with fecal metabolites; Red indicates significant associations of newborn gut *Bacteroides* with fecal metabolites.



**Table S10.** Settings of chromatographic gradient and valve switching time.

Cleanup pump

| Time (min) | A% <sup>a</sup> | B% <sup>a</sup> |
|------------|-----------------|-----------------|
| 0          | 80              | 20              |
| 10         | 80              | 20              |
| 30         | 40              | 60              |
| 30.1       | 80              | 20              |
| 47         | 80              | 20              |

Analysis pump

| Time (min) | C% <sup>a</sup> | D% <sup>a</sup> |
|------------|-----------------|-----------------|
| 0          | 100             | 0               |
| 6          | 100             | 0               |
| 36         | 44              | 56              |
| 38         | 44              | 56              |
| 38.1       | 100             | 0               |
| 47         | 100             | 0               |

Valve cut time

| Time (min) | Valve position |
|------------|----------------|
| 0          | 1-2            |
| 0.1        | 6-1            |
| 5          | 1-2            |

a. Mobile phase: A, ACN; B, H<sub>2</sub>O; C, ACN/H<sub>2</sub>O/100 mM NH<sub>4</sub>FA (pH=3.2) (v/v/v = 8/1/1); D, H<sub>2</sub>O/100 mM NH<sub>4</sub>FA (v/v = 9/1).
